# Supplementary material for: Strong Metal–Support Interactions of Ni-CeO2 Effectively Improve the Performance of a Molten Hydroxide Direct Carbon Fuel Cell
Source: PubMed Central journal article supplement — ACS Omega. 2022 Jul 7;7(28):24646–55. doi: 10.1021/acsomega.2c02479 (PMC9301729; doi:10.1021/acsomega.2c02479), 2022-07-07
Supplement: ao2c02479_si_001.pdf [file ao2c02479_si_001.pdf]

## Support Information

Strong Metal-Support Interactions Ni-CeO<sub>2</sub> Effectively Improves the Performance of Molten Hydroxide

Direct Carbon Fuel Cell

Xiaofeng Li <sup>a,1</sup>, Xiaohui Liu <sup>a,1</sup>, Jiamao Hao <sup>b</sup>, Lijun Li <sup>a</sup>, Yanfang Gao <sup>a,\*</sup>, Yousong Gu <sup>b,\*</sup>, Zhenzhu Cao <sup>a</sup> and Jinrong Liu <sup>a,\*\*</sup>

<sup>a</sup> College of Chemical Engineering, Inner Mongolia University of Technology, Hohhot, 010051, P.R. China

<sup>b</sup> School of Materials Science and Engineering, University of Science and Technology Beijing, Beijing, 100083, P.R. China

E-mail addresses: yf\_gao@imut.edu.cn

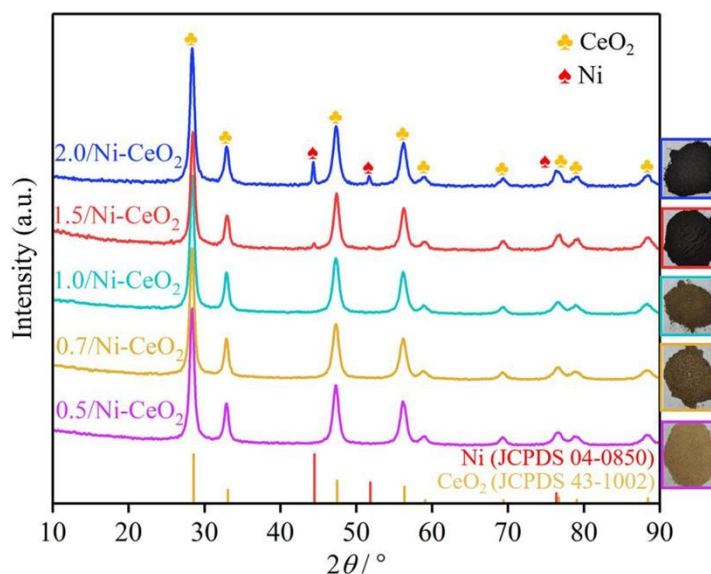

Figure S1. The xrd patterns and photographs of sample Ni-CeO<sub>2</sub> under different Ni/Ce ratios.

Table S1 The mass contents of Ni in different samples were measured by ICP

| Sample                  | Sample contents (mg mL <sup>-1</sup> ) | Ni (10 <sup>-3</sup> mg mL <sup>-1</sup> ) | Ni (%) |
|-------------------------|----------------------------------------|--------------------------------------------|--------|
| 0.5/Ni-CeO <sub>2</sub> | 0.4                                    | 0.87                                       | 0.22   |
| 0.7/Ni-CeO <sub>2</sub> | 0.4                                    | 1.23                                       | 0.31   |
| 1.0/Ni-CeO <sub>2</sub> | 0.4                                    | 4.27                                       | 1.07   |
| 1.5/Ni-CeO <sub>2</sub> | 0.4                                    | 13.11                                      | 3.28   |
| 2.0/Ni-CeO <sub>2</sub> | 0.4                                    | 16.79                                      | 4.20   |
| 1.5/Ni@CeO <sub>2</sub> | 0.4                                    | 21.03                                      | 5.26   |

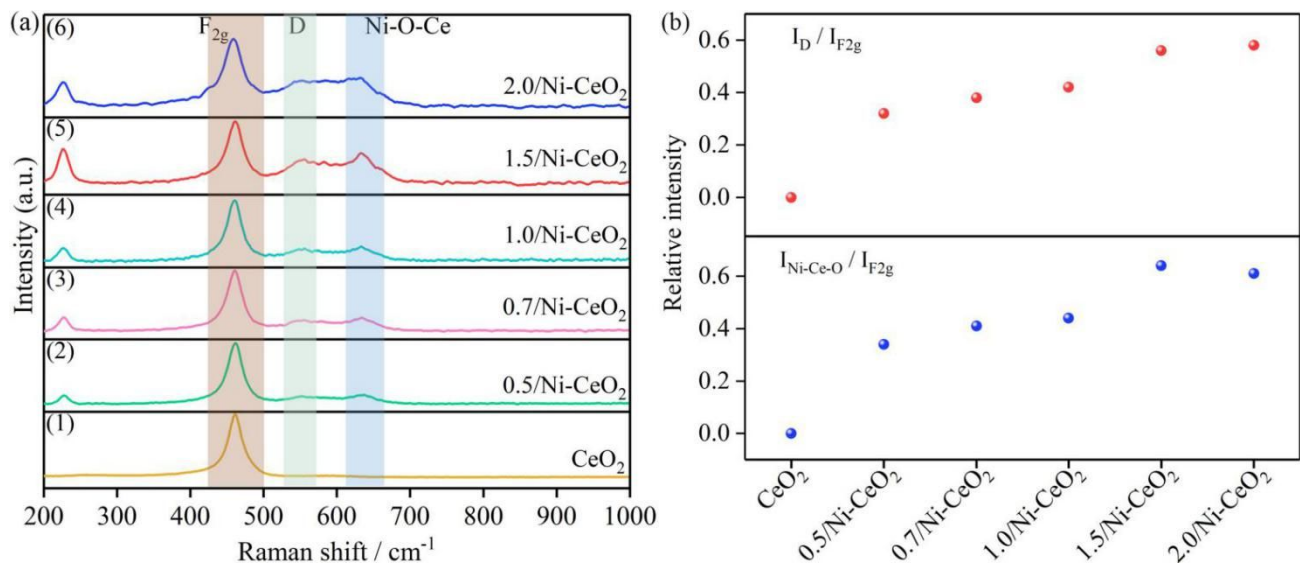

Figure S2. Raman spectra of samples Ni-CeO<sub>2</sub> with different Ni/Ce ratios(a); Relative strength ratio (I<sub>D</sub>/I<sub>F2g</sub>, I<sub>Ni-Ce-O</sub>/I<sub>F2g</sub>) (b).

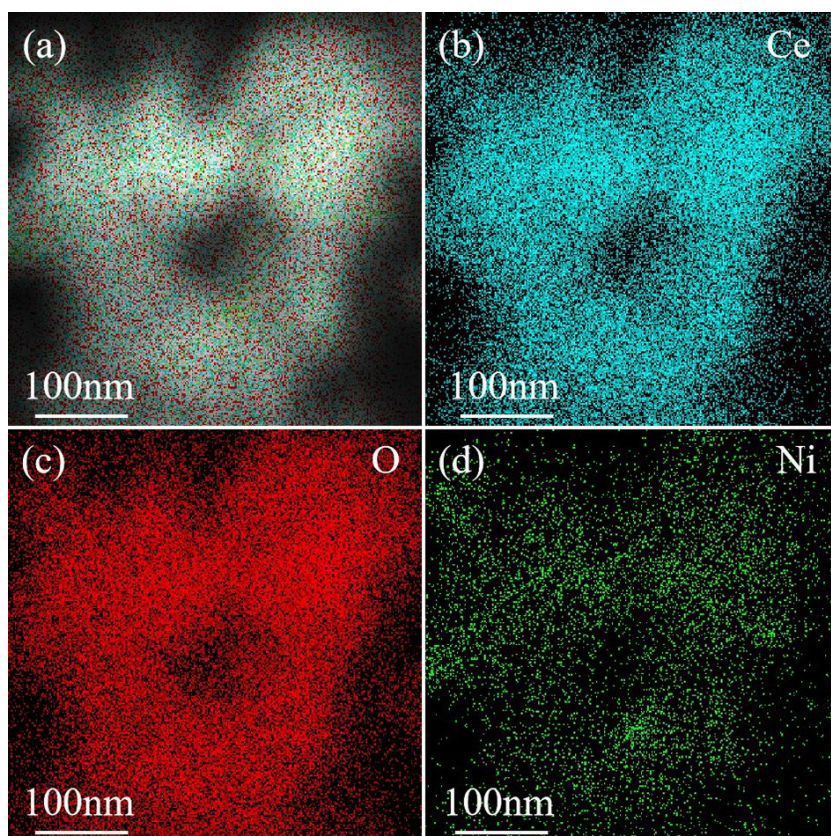

Figure S3. The TEM-EDS image of Ni-CeO<sub>2</sub>; (a) EDS layered image; (b) Ce; (c) O; (d) Ni.

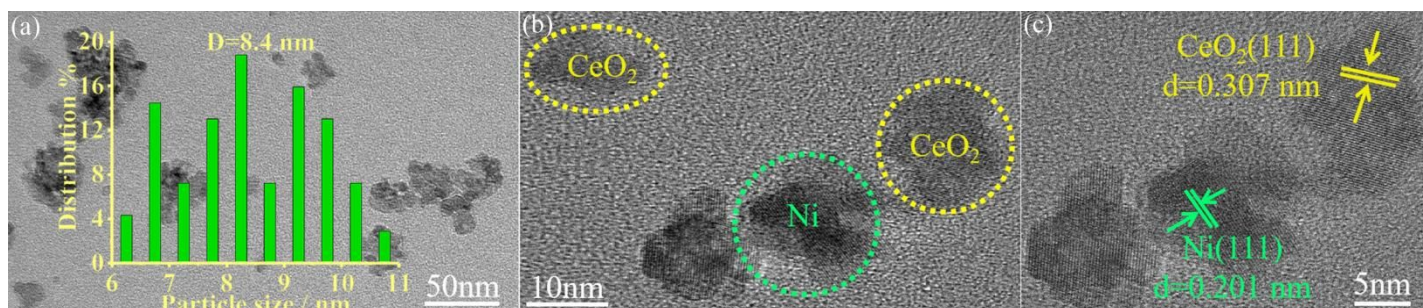

Figure S4. TEM and HRTEM images of Ni@CeO<sub>2</sub>; (a) TEM and particle size distribution; (b), (c) HRTEM.

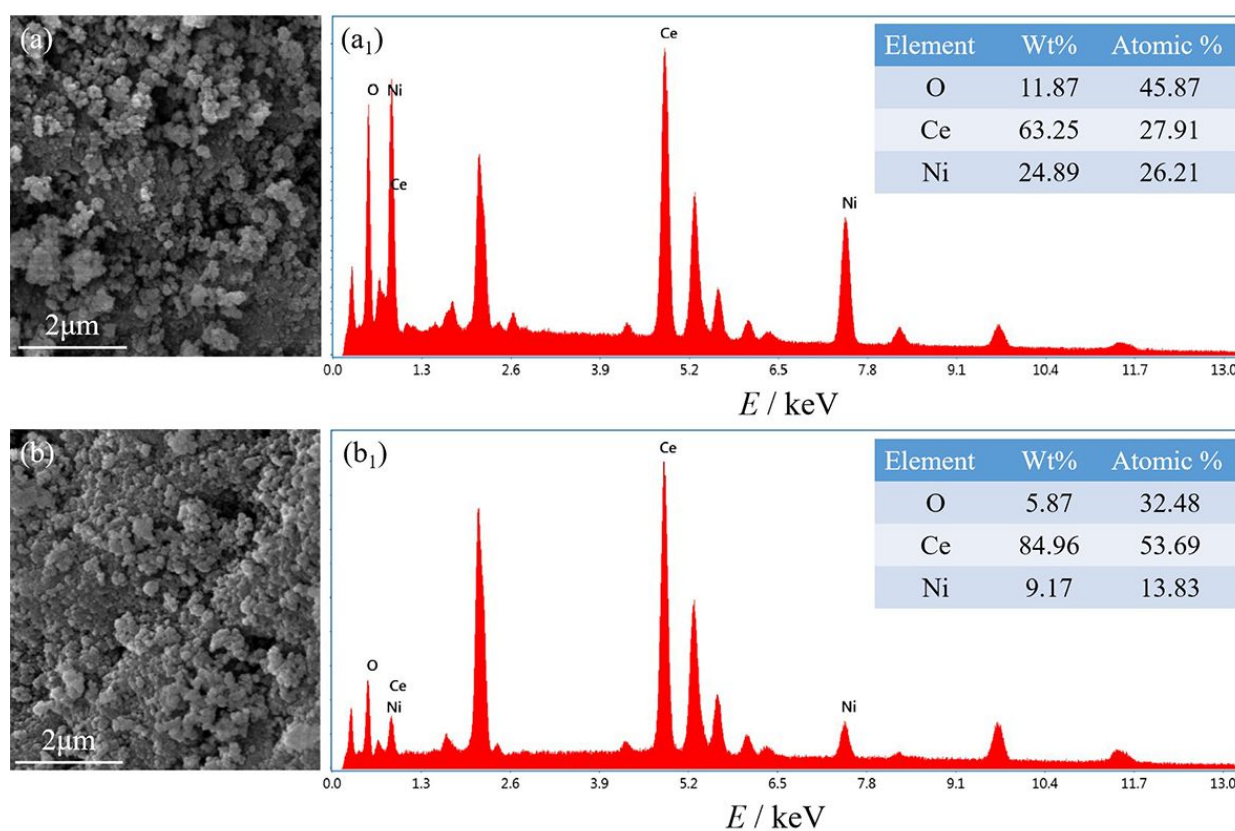

Figure S5. SEM and EDS spectrum diagram (a) Ni@CeO<sub>2</sub>; (b) Ni-CeO<sub>2</sub>.



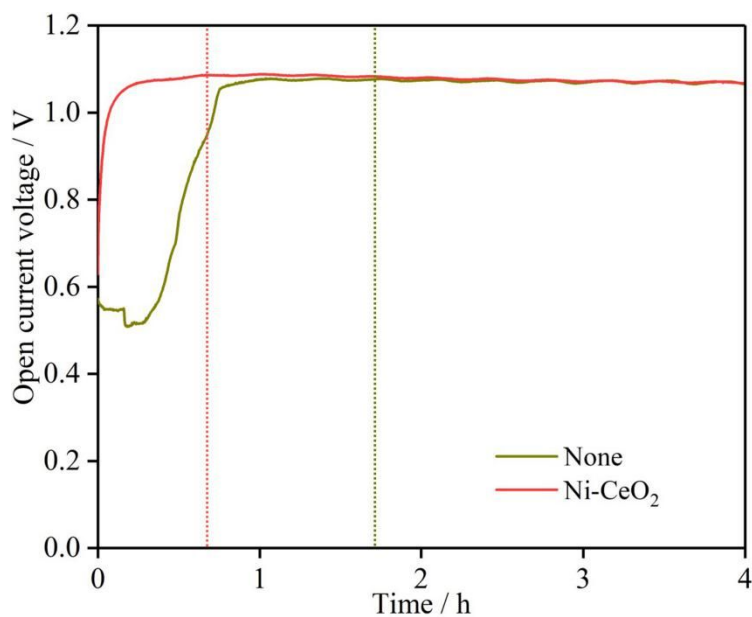

Figure S6. The chronopotentiometry curves of with and without Ni-CeO<sub>2</sub>, respectively.

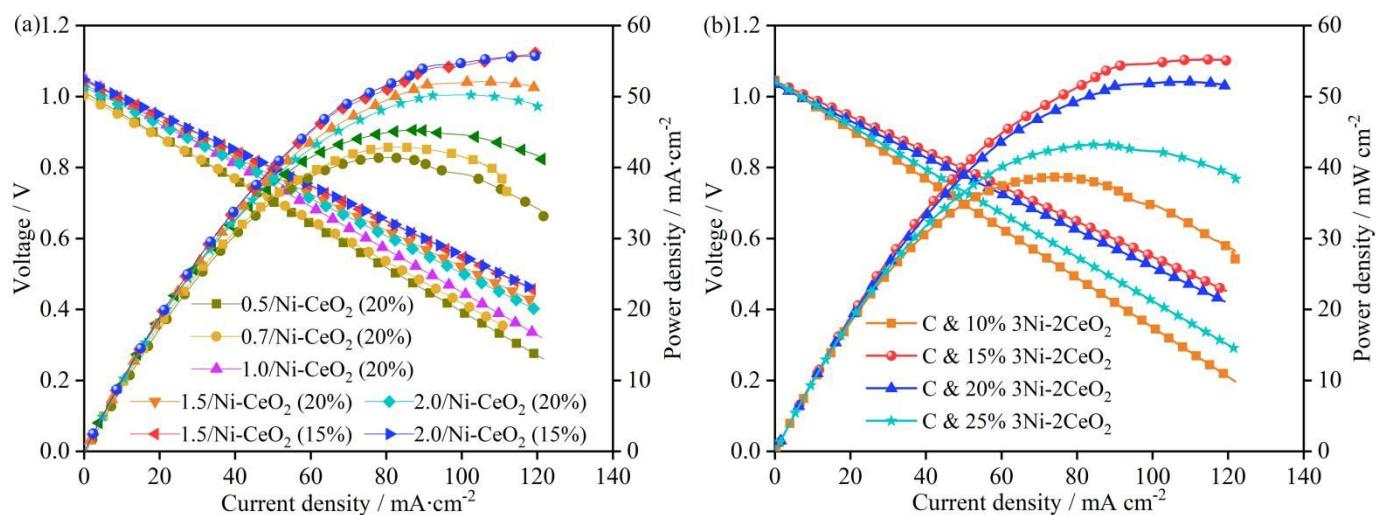

Figure S7. The electrochemical performance of MHDCFC at electrolyte NaOH-KOH (mole ratio of 1:1). (a) The  $V-I-P$  curves of different molar ratio of Ni-Ce. (b) .The  $V-I-P$  curves of different contents of Ni-CeO<sub>2</sub>.

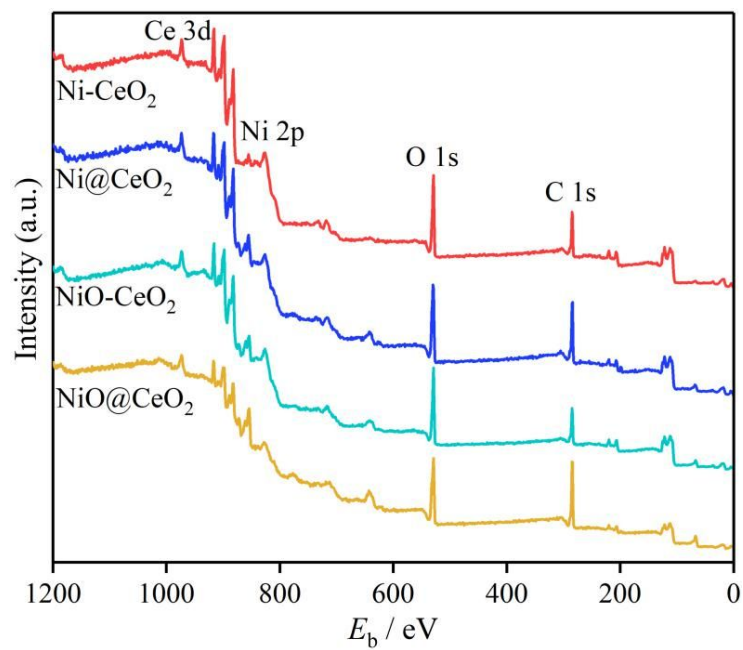

Figure S8. XPS survey spectra of different materials.
